# Supplementary material for: Daily Low-Level Red Light for Spherical Equivalent Error and Axial Length in Children With Myopia: A Randomized Clinical Trial
Source: PubMed Central journal article supplement (PMC11046409; doi:10.1001/jamaophthalmol.2024.0801), 2024-04-25
Supplement: jamaophthalmol-e240801-s003.pdf [file jamaophthalmol-e240801-s003.pdf]

## Data Sharing Statement

Cao. Daily Low-Level Red Light for Spherical Equivalent Error and Axial Length in Children With Myopia. *JAMA Ophthalmol*. Published April 18, 2024.  
doi:10.1001/jamaophthalmol.2024.0801

### Data

**Data available:** No
